# Supplementary material for: Acetylcholine and Royal Jelly Fatty Acid Combinations as Potential Dry Eye Treatment Components in Mice
Source: MDPI journal article supplement (doi:10.3390/nu13082536), 2021-07-24
Supplement: s1 [file s1]

Supplementary Information for  
**Acetylcholine and royal jelly fatty acid combinations as potential dry eye  
treatment components in mice.**

Masayuki Yamaga <sup>1</sup>† & Toshihiro Imada <sup>2</sup>†, Hiroko Tani <sup>1</sup>, Shigeru Nakamura <sup>2</sup>, Ayanori Yamaki <sup>1</sup>,  
Kazuo Tsubota <sup>2,3</sup> \*

<sup>1</sup> Institute for Bee Products and Health Science, Yamada Bee Company, Inc., Okayama, 708-0393, Japan; my1636@yamada-bee.com (M.Y.); ht0807@yamada-bee.com (H.T.); ay1255@yamada-bee.com (A.Y.)

<sup>2</sup> Department of Ophthalmology, Keio University School of Medicine, Tokyo, 160-8582, Japan; imada\_toshihiro@keio.jp (T.I.); s-nakamura.a5@keio.jp (S.N.); tsubota@z3.keio.jp (K.T.)

<sup>3</sup> Tsubota Laboratory, Inc., Shinjuku-ku, Tokyo, 160-0016, Japan; tsubota@z3.keio.jp (K.T.)

† These authors contributed equally to this work.

\* Correspondence: Email: tsubota@z3.keio.jp Phone number: +81-6384-2866

**Table of contents**

• **Experimental section**

- **Scheme S1.** Synthesis of (*E, R*)-11, 12-dihydroxy-2-dodecenoic acid.
- **Figure S1.** <sup>1</sup>H NMR spectrum of (*E, R*)-11, 12-dihydroxy-2-dodecenoic acid.
- **Figure S2.** <sup>13</sup>C NMR spectrum of (*E, R*)-11, 12-dihydroxy-2-dodecenoic acid.
- **Table S1.** Validation data of the analytical methods for acetylcholine and RJ fatty acids.

## Experimental section

### General Procedure

Optical rotation was measured using a HORIBA SEPA-500 digital polarimeter. IR spectra were recorded by the attenuated total reflection method using ZnSe prism on a JASCO FTIR-4100 spectrophotometer.  $^1\text{H}$  and  $^{13}\text{C}$  NMR spectra were recorded at JEOL ECA600 spectrometers. Chemical shifts were referenced to a residual signal of  $\text{CD}_3\text{OD}$  ( $\delta_{\text{H}}$  3.30) or the solvent signal ( $\delta_{\text{C}}$  49.0). HRMS were recorded on a Thermo-Fisher Scientific Orbitrap Q Exactive focus mass spectrometer.

### (E, R)-11, 12-Dihydroxy-2-dodecenoic acid

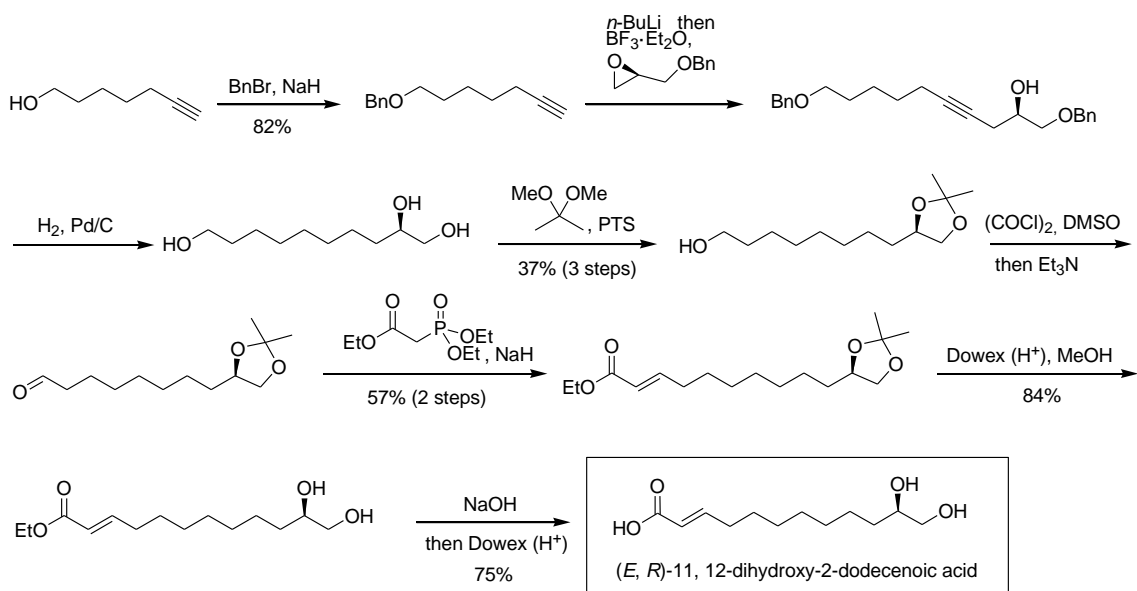

**Scheme S1.** Synthesis of (E, R)-11, 12-dihydroxy-2-dodecenoic acid.

The title compound was prepared according to the procedures described in the patent (US2019/0230967 A1 [26]) and Scheme S1, and confirmed the structure by NMR and mass spectra.

$[\alpha]_{\text{D}}^{24} = +5.1$  (c 0.55, methanol); IR (ZnSe) 3522, 3203, 2913, 2841, 1710, 1652, 1449, 1290, 1173, 1014  $\text{cm}^{-1}$ ;  $^1\text{H}$  NMR ( $\text{CD}_3\text{OD}$ , 600 MHz):  $\delta$  6.94 (dt,  $J=15.6$ , 7.2 Hz, 1H), 5.78 (dt,  $J=15.6$ , 1.2 Hz, 1H), 3.55 (m, 1H), 3.46 (dd,  $J=11.4$ , 4.8 Hz, 1H), 3.40 (dd,  $J=11.4$ , 6.6 Hz, 1H), 2.21 (ddt, 7.2, 1.2, 7.8 Hz, 2H), 1.52-1.36 (m, 12H);  $^{13}\text{C}$  NMR ( $\text{CD}_3\text{OD}$ , 150 MHz)  $\delta$  170.8, 151.3, 122.5, 73.3, 67.4, 34.3, 33.1, 30.3, 30.1, 29.9, 29.2; negative-ion ESIMS:  $m/z$  229  $[\text{M-H}]^-$ ; HRMS (ESI) calcd for  $\text{C}_{12}\text{H}_{22}\text{O}_4$   $[\text{M-H}]^-$  229.1445, found 229.1444.

**Figure S1.**  $^1\text{H}$  NMR spectrum of (*E*, *R*)-11, 12-dihydroxy-2-dodecenoic acid ( $\text{CD}_3\text{OD}$ , 600 MHz)

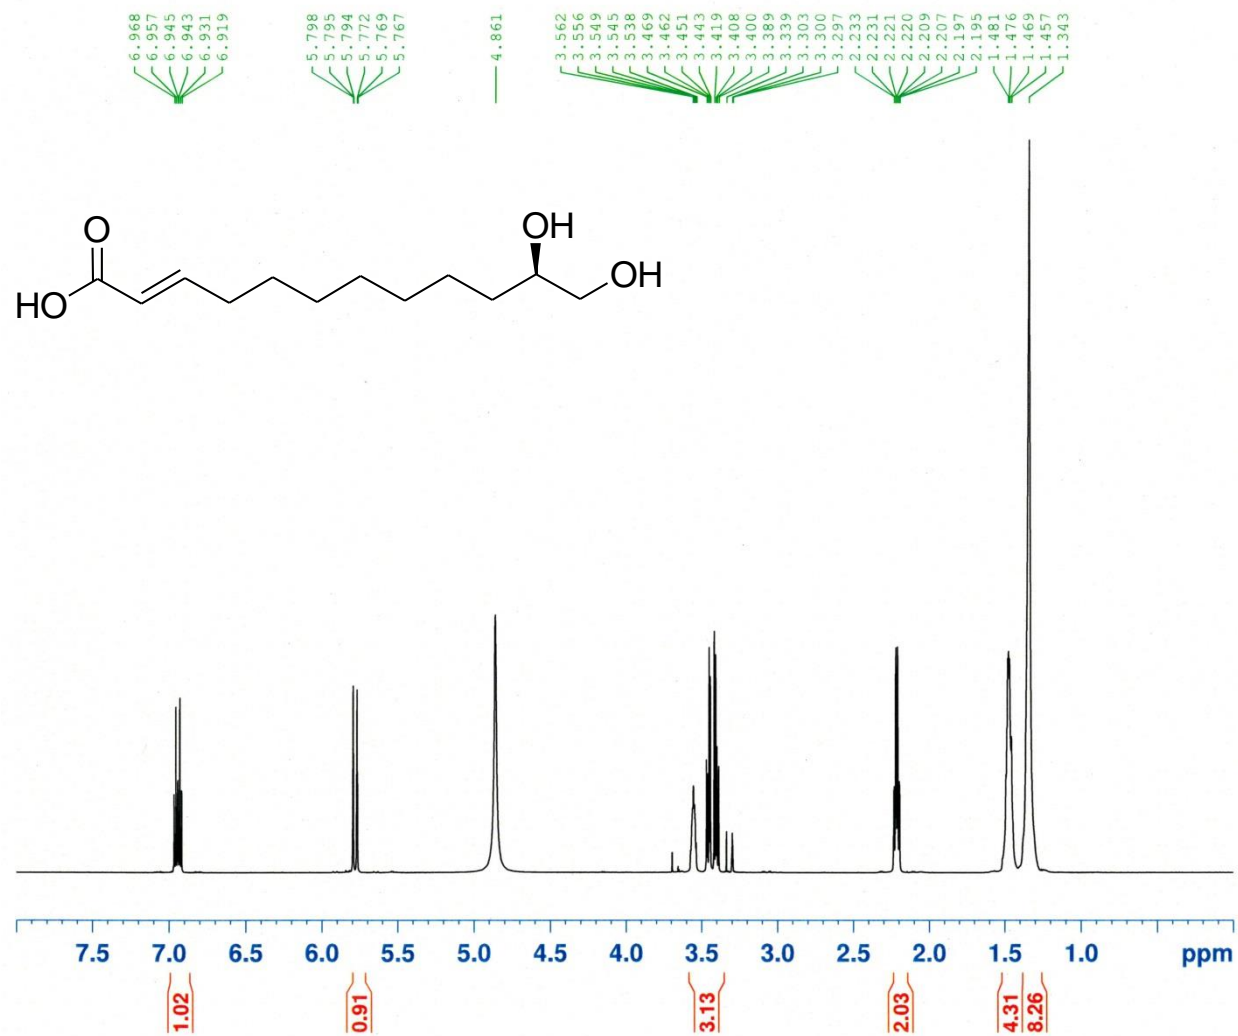

**Figure S2.**  $^{13}\text{C}$  NMR spectrum of (*E, R*)-11, 12-dihydroxy-2-dodecenoic acid ( $\text{CD}_3\text{OD}$ , 150 MHz)

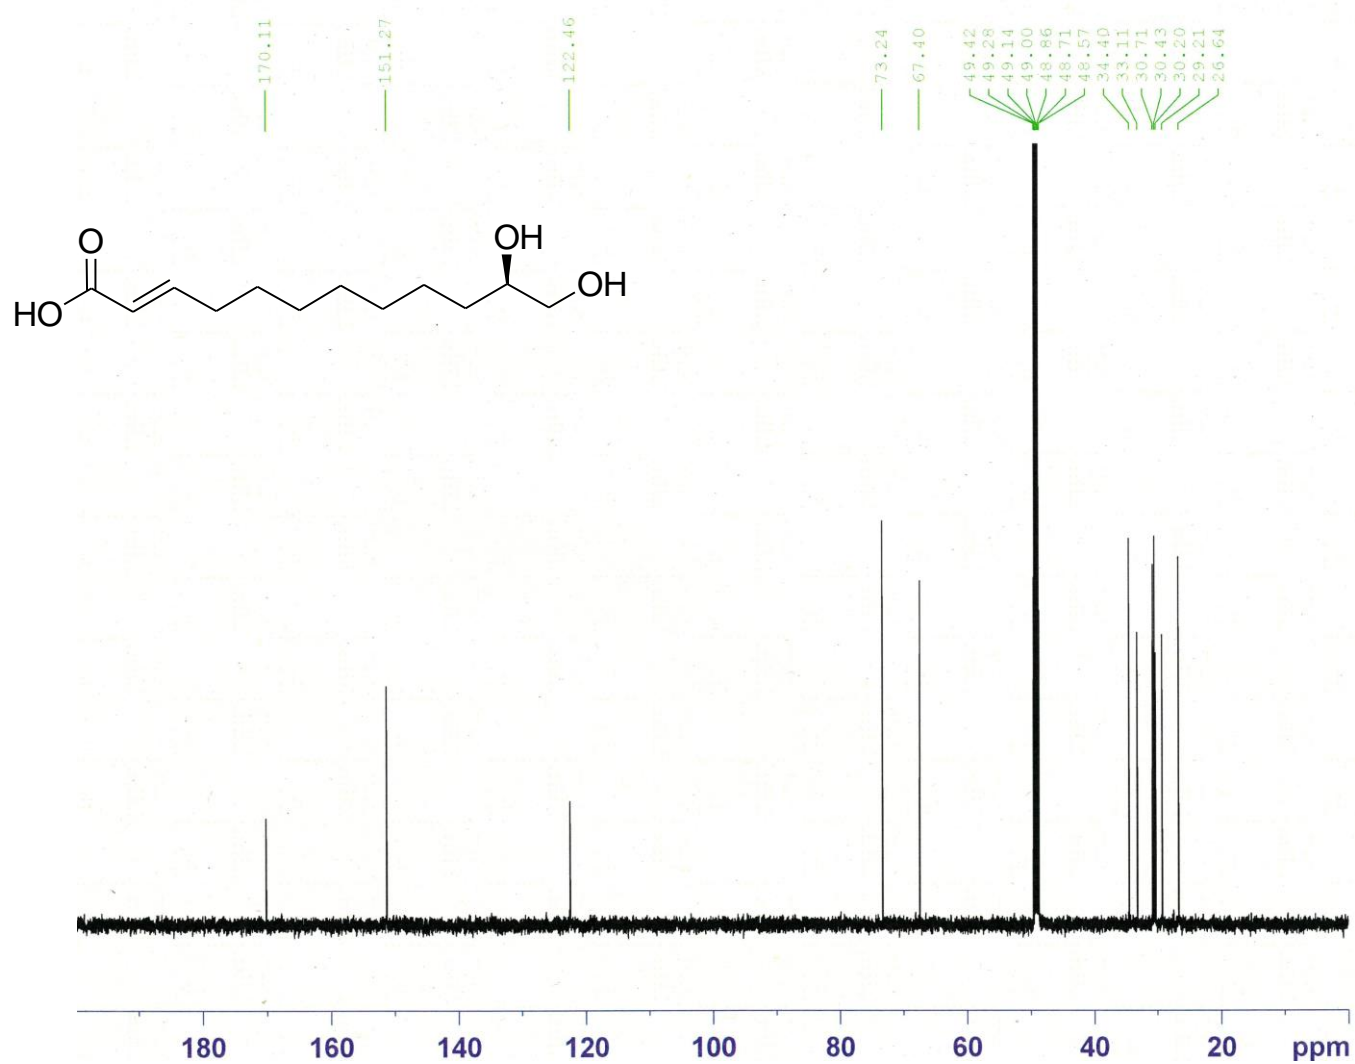

**Table S1.** Validation data of the analytical methods for acetylcholine and RJ fatty acids.

| Compounds                                               | Accuracy<br>(Recovery)<br>(%) | Repeatability<br>(RSD %) | Reproducibility<br>(RSD %) | LOD<br>(S/N=3)<br>(ng/mL) | LOQ<br>(S/N = 10)<br>(ng/mL) | Range<br>(ng/mL) | $R^2$ |
|---------------------------------------------------------|-------------------------------|--------------------------|----------------------------|---------------------------|------------------------------|------------------|-------|
| Acetylcholine (ACh)                                     | 106.35                        | 3.81                     | 4.46                       | 0.13                      | 0.43                         | 1-1000           | 0.999 |
| 8-hydroxyoctanoic acid (8HOA)                           | 107.58                        | 5.03                     | 5.25                       | 0.34                      | 1.14                         | 1-1000           | 0.999 |
| (R)-3,10-dihydroxydecanoic acid (3,10DDA)               | 108.89                        | 4.20                     | 4.79                       | 0.40                      | 1.33                         | 1-1000           | 0.999 |
| 10-hydroxydecanoic acid (10HDAA)                        | 101.15                        | 3.14                     | 3.30                       | 0.48                      | 1.58                         | 1-1000           | 0.999 |
| (E)-9,10-dihydroxy-2-decenoic acid (9,10D2DA)           | 106.15                        | 10.16                    | 11.37                      | 0.60                      | 2.01                         | 1-1000           | 0.999 |
| (E)-10-hydroxy-2-decenoic acid (10H2DA)                 | 113.34                        | 4.57                     | 4.69                       | 0.66                      | 2.20                         | 1-1000           | 0.999 |
| (E)-2-decenedioic acid (2DA)                            | 110.11                        | 4.26                     | 4.80                       | 0.35                      | 1.17                         | 1-1000           | 0.999 |
| Sebacic acid (SA)                                       | 107.14                        | 9.90                     | 9.93                       | 3.82                      | 12.72                        | 1-1000           | 0.999 |
| (E, R)-11,12-dihydroxy-2-dodecenoic acid<br>(11,12D2DA) | 107.82                        | 2.37                     | 3.35                       | 0.39                      | 1.30                         | 1-1000           | 0.999 |
| 12-hydroxydodecanoic acid (12HDA)                       | 109.31                        | 11.92                    | 13.55                      | 0.46                      | 1.54                         | 1-1000           | 0.999 |
